# Supplementary material for: The Anti-Inflammatory Effects of Invigorating Kidney and Supplementing Qi Chinese Herbal Formulae in Asthma Patients
Source: PubMed Central journal article supplement (PMC5504930; doi:10.1155/2017/3754145), 2017-06-27
Supplement: 3754145.f1.pdf [file 3754145.f1.pdf]

## Supplementary Material Catalogue

### Part 1 sTables

**sTable1.** Allocation of Subject in Each Center

**sTable 2.** The gradient elution for quantitative analysis of BSFC

**sTable 3.** The gradient elution for quantitative analysis of BSYQ

**sTable4 .** Adverse events

**sTable 5.** Adverse responses

### Part 2 sFigures

**sFigure 1.** The main compounds of BSFC and BSYQ

**sFigure 2.** Effects of 6 months of treatment with two formulae or placebo on serum (A) IL-6, (B)IL-10, (C) IL-17, (D) IgE , (E) ECP and (F) eosinophil numbers.

## Part 1 sTables

**sTable1 Allocation of Subject in Each Centre**

|                              | Huashan<br>Hospital | Xiyuan Hospital<br>CACMS | West China<br>Hospital of<br>Sichuan University | The First Affiliated<br>Hospital of Henan<br>University of TCM | Jiangsu Province<br>Hospital of TCM |
|------------------------------|---------------------|--------------------------|-------------------------------------------------|----------------------------------------------------------------|-------------------------------------|
| Treatment Group<br>(Subject) | 40                  | 20                       | 20                                              | 20                                                             | 20                                  |
| Treatment Group<br>(Subject) | 40                  | 20                       | 20                                              | 20                                                             | 20                                  |
| Control Group<br>(Subject)   | 40                  | 20                       | 20                                              | 20                                                             | 20                                  |
| Total: 360                   | 120                 | 60                       | 60                                              | 60                                                             | 60                                  |

**sTable 2. The gradient elution for quantitative analysis of BSFC**

| Time (min) | 0.1% Formic acid water (%) | Acetonitrile (%) |
|------------|----------------------------|------------------|
| 0          | 87                         | 13               |
| 1          | 87                         | 13               |
| 2.5        | 70                         | 30               |
| 5          | 50                         | 50               |
| 7          | 20                         | 80               |
| 7.5        | 10                         | 90               |
| 10         | 10                         | 90               |
| 10.5       | 87                         | 13               |
| 15         | 87                         | 13               |

**sTable 3. The gradient elution for quantitative analysis of BSYQ**

| Time (min) | 0.1% Formic acid water (%) | Acetonitrile (%) |
|------------|----------------------------|------------------|
| 0          | 92                         | 8                |
| 8          | 74                         | 26               |
| 16         | 65                         | 35               |
| 23         | 10                         | 90               |
| 26         | 10                         | 90               |

**sTable 4 . Adverse events**

| Adverse events                      | BSFC      | BSYQ      | Placebo   | F          | P       |
|-------------------------------------|-----------|-----------|-----------|------------|---------|
|                                     |           |           |           | Chi-square | P-Value |
| N(missing)                          | 103(0)    | 109(0)    | 105(0)    | 0.43       | 0.8066  |
| Frequency of adverse events         | 25        | 24        | 21        |            |         |
| rate (%)                            | 24.27     | 22.02     | 20.00     |            |         |
|                                     |           |           |           | Chi-square | P-Value |
| N(missing)                          | 103(0)    | 109(0)    | 105(0)    | 0.2167     | 0.897   |
| Patients with adverse events (%)    | 15(14.56) | 15(13.76) | 13(12.38) |            |         |
| Patients without adverse events (%) | 88(85.44) | 94(86.24) | 92(87.62) |            |         |

**sTable 5. Adverse responses**

| Adverse responses                     | BSFC      | BSYQ      | Placebo   | F          | P       |
|---------------------------------------|-----------|-----------|-----------|------------|---------|
|                                       |           |           |           | Chi-square | P-Value |
| N(missing)                            | 103(0)    | 109(0)    | 105(0)    | 0.57       | 0.7518  |
| Frequency                             | 24        | 21        | 20        |            |         |
| Rate (%)                              | 23.30     | 19.27     | 19.05     |            |         |
|                                       |           |           |           | Chi-square | P-Value |
| N(missing)                            | 103(0)    | 109(0)    | 105(0)    | 0.029      | 0.986   |
| Patients with adverse response (%)    | 15(14.56) | 15(13.76) | 15(14.29) |            |         |
| Patients without adverse response (%) | 88(85.44) | 94(86.24) | 90(85.71) |            |         |

## Part 2 sFigures

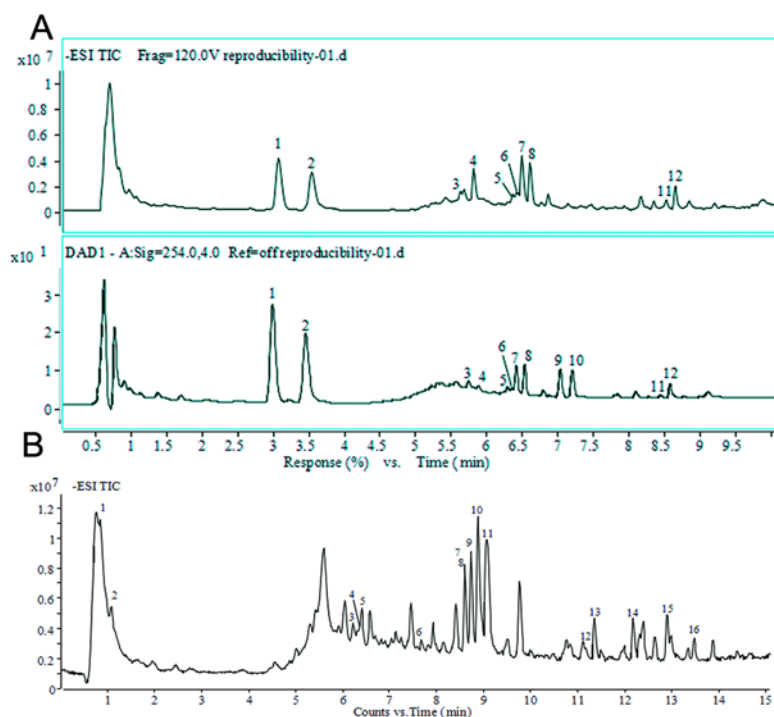

**Figure 1. (A) Total ion chromatography (above) and UV chromatography (below) of the BSFC formula(Formula A). (B) Total ion chromatography of the BSYQ formula(Formula B).**

| Main compounds in Formula A |                      |                                   |
|-----------------------------|----------------------|-----------------------------------|
| No.                         | Compounds            | ( $\mu\text{g}/\text{mg}$ tablet) |
| 1                           | <b>Psoralenoside</b> | <b>4.53<math>\pm</math>0.14</b>   |
| 2                           | Isopsoralenoside     | 2.96 $\pm$ 0.10                   |
| 3                           | Naringin             | 0.239 $\pm$ 0.007                 |
| 4                           | Hesperidin           | 1.12 $\pm$ 0.04                   |
| 5                           | Epimedin A           | 0.221 $\pm$ 0.009                 |
| 6                           | Epimedin B           | 0.214 $\pm$ 0.008                 |
| 7                           | Epimedin C           | 1.33 $\pm$ 0.01                   |
| 8                           | Icariin              | 0.618 $\pm$ 0.018                 |
| 9                           | Coryfolin            | 0.158 $\pm$ 0.003                 |
| 10                          | Corylifolinin        | 0.126 $\pm$ 0.003                 |
| 11                          | Baohuoside-I         | 1.30 $\pm$ 0.03                   |
| 12                          | Psoralen             | 0.0552 $\pm$ 0.0012               |

| Main compounds in Formula B |                                        |                                    |
|-----------------------------|----------------------------------------|------------------------------------|
| No.                         | Compounds                              | ( $\mu\text{g}/\text{mg}$ granule) |
| 1                           | Catalpol                               | 1.97 $\pm$ 0.21                    |
| 2                           | Leonuride                              | 0.221 $\pm$ 0.009                  |
| 3                           | Calycosin-7-O- $\beta$ -D-glucoside    | 0.183 $\pm$ 0.003                  |
| 4                           | Hyperoside                             | 0.127 $\pm$ 0.003                  |
| 5                           | Acteoside                              | 0.246 $\pm$ 0.005                  |
| 6                           | Formononetin-7-O- $\beta$ -D glucoside | 0.0946 $\pm$ 0.002                 |
| 7                           | Epimedin A                             | 0.472 $\pm$ 0.010                  |
| 8                           | Calycosin                              | 0.167 $\pm$ 0.011                  |
| 9                           | Epimedin B                             | 1.59 $\pm$ 0.02                    |
| 10                          | Epimedin C                             | 3.01 $\pm$ 0.22                    |
| 11                          | <b>Icariin</b>                         | <b>3.14 <math>\pm</math> 0.08</b>  |
| 12                          | Formononetin                           | 0.0943 $\pm$ 0.0022                |
| 13                          | Astragaloside IV                       | 1.17 $\pm$ 0.10                    |
| 14                          | Astragaloside II                       | 0.447 $\pm$ 0.003                  |
| 15                          | Baohuoside-I                           | 0.964 $\pm$ 0.033                  |
| 16                          | Astragaloside I                        | 0.479 $\pm$ 0.003                  |

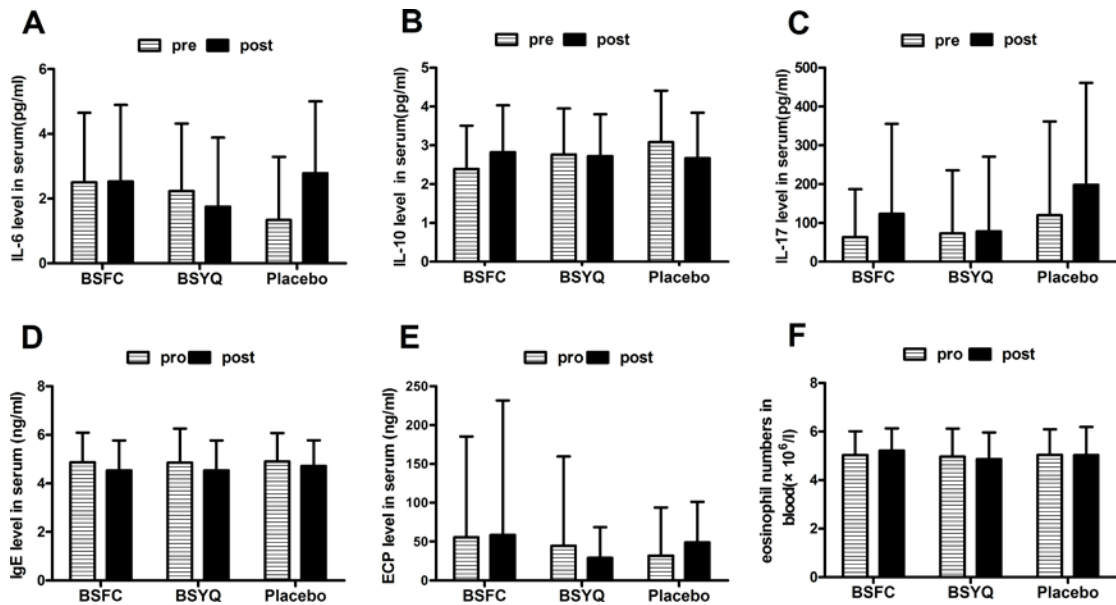

**Figure 2.** Effects of 6 months of treatment with two formulae or placebo on serum (A) IL-6, (B)IL-10, (C) IL-17, (D) IgE , (E) ECP and (F) eosinophil numbers. Data are means  $\pm$ SDs, in addition to IL-17 and ECP (the data were normal distribution), other data were log-transformed. The IL-17, IL-10, IL-6, IgE and ECP were determined by ELISA. For eosinophil numbers count, twenty microliters of peripheral blood collected from a finger stick were diluted in 380 ml staining buffer. The leukocytes were counted by using a hemacytometer. The absolute eosinophil number was calculated. For ELISA measure, venous blood samples were obtained from all patients before and 6 months after treatment. Serum IL-6, IL-10, IL-17, IgE and ECP were measured by commercial ELISA kit (Anogen Yes Biotech Laboratories Ltd, Mississauga, Ontario, Canada and edical & Biological Laboratories Co.,Ltd.Nagoya, Japan) according to the manufacturer's instructions
